# Supplementary material
Source: publisher figshare collection journal article supplement (https://asha.figshare.com/articles/dataset/_/10073183)
Supplement: Supplementary file 1 [file 1]

## Sheet: Sheet1
Supplemental material, Guo et al., “Finite Verb Morphology Composite Between Age 4 and Age 9 for the Edmonton Narrative Norms Instrument: Reference Data and Psychometric Properties,” LSHSS, https://doi.org/10.1044/2019_LSHSS-19-0028
Z Score & Confidence Interval Calculation Table for FVMC
Please enter the FVMC raw score in percentage, not in proportion, into the cell (marked in red) based on the child's age
4 Year Olds
		FVMC
	Mean	0.945
	SD	0.0823
	90% CI Upper Limit	0.7619
	90% CI Lower Limit	0.6029
	95% CI Upper Limit	0.7774
	95% CI Lower Limit	0.5874
FVMC
RAW SCORE	z-score
0.6824	-3.19077
5 Year Olds
		FVMC
	Mean	0.9715
	SD	0.0538
	90% CI Upper Limit	0.7105
	90% CI Lower Limit	0.5961
	95% CI Upper Limit	0.7216
	95% CI Lower Limit	0.585
FVMC
RAW SCORE	z-score
0.6533	-5.9145
6 Year Olds
		FVMC
	Mean	0.9755
	SD	0.031
	90% CI Upper Limit	0.7709
	90% CI Lower Limit	0.6715
	95% CI Upper Limit	0.7806
	95% CI Lower Limit	0.6618
FVMC
RAW SCORE	z-score
0.7212	-8.20323
7 Year Olds
		FVMC
	Mean	0.9848
	SD	0.036
	90% CI Upper Limit	0.6829
	90% CI Lower Limit	0.6195
	95% CI Upper Limit	0.689
	95% CI Lower Limit	0.6134
FVMC
RAW SCORE	z-score
0.6512	-9.26667
8 Year Olds
		FVMC
	Mean	0.9845
	SD	0.0205
	90% CI Upper Limit	0.6371
	90% CI Lower Limit	0.5719
	95% CI Upper Limit	0.6435
	95% CI Lower Limit	0.5655
FVMC
RAW SCORE	z-score
0.6045	-18.5366
9 Year Olds
		FVMC
	Mean	0.9874
	SD	0.0209
	90% CI Upper Limit	0.7107
	90% CI Lower Limit	0.6477
	95% CI Upper Limit	0.7169
	95% CI Lower Limit	0.6415
FVMC
RAW SCORE	z-score
0.6792	-14.7464
