# Supplementary material
Source: publisher figshare collection journal article supplement (https://asha.figshare.com/articles/dataset/_/10073183)
Supplement: Supplementary file 2 [file 1]

## **Supplemental Material S1.** Description of the stories in the ENNI protocol.

The pictures sequences can be downloaded from the ENNI website:

<https://www.ualberta.ca/communications-sciences-and-disorders/resources-for-clinicians-and-researchers/edmonton-narrative-norms-instrument/pictures-analyses-and-comprehension>.

Below are the sample stories created by the fourth author in the present study for each picture sequence.

### ***Training Story***

One day the boy was going shopping for some food. He walked past some boxes of cookies. They chocolate chip cookies were his favorite. He pulled out a box that was close to him. When he pulled out the box, all of the other boxes fell down. The boy was afraid of the store manager, so he ran away.

### ***A1***

The giraffe and the elephant were bouncing a ball by the pool. The ball bounced into the pool. Then the giraffe jumped into the pool to get the ball. The elephant was scared. The giraffe got the ball and gave it to the elephant. The elephant was happy, but the giraffe was all wet.

### ***A2***

The giraffe and the elephant were going to go swimming. The elephant wanted to jump off the diving board. She ran over to get ready to jump in the pool. She was not supposed to run, and she fell. The elephant got hurt on her knee, so her friend came to help. She was crying. The lifeguard also came to help. The lifeguard put a band aide on her knee. He told her not to run anymore.

### ***A3***

The giraffe and the elephant were going to go swimming. The giraffe was playing with his airplane. The elephant grabbed the airplane. Then the airplane fell into the pool. It began to sink and the giraffe was mad. The lifeguard came to see what was happening. The elephant told him that the plane fell in the pool. The giraffe was sad, so the lifeguard tried to get the airplane out. The airplane was too far away and the giraffe began to cry. The elephant's mom came to get the airplane out. She had a net and she reached the airplane. The mom gave the airplane to the giraffe. The giraffe and the elephant were friends again.

### ***B1***

The rabbit asked the dog to play in the sandbox. The dog was making a fancy sandcastle. The rabbit wanted to help. He poured some sand on the castle. Then the castle was a mess. The rabbit said, "oh no!" The dog tried to fix it.

### ***B2***

The dog and the rabbit were having a picnic. The rabbit ate a lot of food and his stomach was full. The rabbit got a stomachache. The dog ran to find the doctor. He pulled the doctor over to his friend. The doctor came to help the rabbit. He took the rabbit home and the dog stayed at the picnic.

### ***B3***

The dog was pulling her wagon and the rabbit was running. The rabbit said, "I like your balloon!" The rabbit started taking the balloon and the dog said, 'hey!' The balloon started to fly away. The dog was angry at the rabbit. Then the balloon man was walking by. The rabbit said, "I want a balloon!" The man said you need to pay me five cents. The rabbit did not have any money in his pockets. He went over to ask the doctor for some money. The rabbit showed the doctor the balloons. The doctor paid for two balloons. The dog and the rabbit each had a balloon now.
