# Supplementary material
Source: publisher figshare collection journal article supplement (https://asha.figshare.com/articles/dataset/_/10073183)
Supplement: Supplementary file 3 [file 1]

Supplemental Material S4. F values, p values, and effect sizes (d) for the group differences in total number of C-units, mean length of C-units in morphemes (MLCUM), number of different words (NDW), and number of obligatory contexts for the FVMC analysis (# of OC for FVMC) by age.

| Age         | Total Number of C-units                       | MLCUM                                          | NDW                                            | # of OC for FVMC                              |
|-------------|-----------------------------------------------|------------------------------------------------|------------------------------------------------|-----------------------------------------------|
| 4 years old | $F(1, 61) = 2.65$<br>$p = .109$<br>$d = 0.41$ | $F(1, 61) = 23.88$<br>$p < .001$<br>$d = 1.26$ | $F(1, 61) = 17.39$<br>$p < .001$<br>$d = 1.08$ | $F(1, 61) = 7.93$<br>$p = .007$<br>$d = 0.73$ |
| 5 years old | $F(1, 63) = 0.05$<br>$p = .830$<br>$d = 0.06$ | $F(1, 63) = 30.84$<br>$p < .001$<br>$d = 1.41$ | $F(1, 63) = 8.88$<br>$p = .004$<br>$d = 0.76$  | $F(1, 63) = 4.57$<br>$p = .037$<br>$d = 0.54$ |
| 6 years old | $F(1, 60) = 0.08$<br>$p = .773$<br>$d = 0.06$ | $F(1, 60) = 2.77$<br>$p = .101$<br>$d = 0.43$  | $F(1, 60) = 3.99$<br>$p = .050$<br>$d = 0.52$  | $F(1, 60) = 0.48$<br>$p = .49$<br>$d = 0.18$  |
| 7 years old | $F(1, 62) = 0.65$<br>$p = .423$<br>$d = 0.21$ | $F(1, 62) = 18.98$<br>$p < .001$<br>$d = 1.12$ | $F(1, 62) = 3.22$<br>$p = .078$<br>$d = 0.46$  | $F(1, 62) = 2.76$<br>$p = .102$<br>$d = 0.42$ |
| 8 years old | $F(1, 66) = 0.61$<br>$p = .436$<br>$d = 0.19$ | $F(1, 66) = 30.12$<br>$p < .001$<br>$d = 1.36$ | $F(1, 66) = 7.35$<br>$p = .009$<br>$d = 0.67$  | $F(1, 66) = 5.90$<br>$p = .018$<br>$d = 0.60$ |
| 9 years old | $F(1, 59) = 0.15$<br>$p = .698$<br>$d = 0.11$ | $F(1, 59) = 8.98$<br>$p = .004$<br>$d = 0.79$  | $F(1, 59) = 0.36$<br>$p = .553$<br>$d = 0.16$  | $F(1, 59) = 1.51$<br>$p = .224$<br>$d = 0.32$ |
